# Supplementary material
Source: Elsevier journal article supplement (https://www.sciencedirect.com/science/article/pii/S2530064417302146)
Supplement: mmc1 [file S2530064417302146:mmc1.pdf]

Supplementary Material S.1.

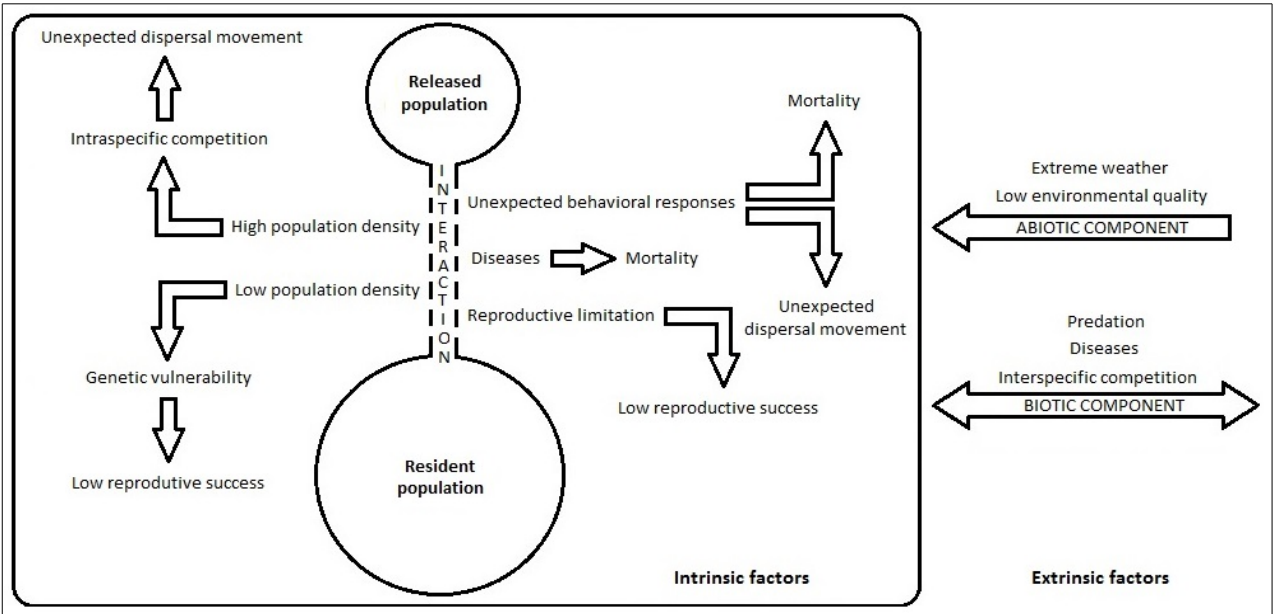

S.1. Conceptual model of drivers that can negatively impact population restoration programs. Intrinsic factors are directly related to the target species, and extrinsic factors include interactions with other species or environment. Interaction among resident and reintroduced populations is provided only in reinforcement attempts.
